# Supplementary material for: Effect of fluorine substitution and position on phenylene spacer in carbazole based organic sensitizers for dye sensitized solar cells
Source: Royal Society of Chemistry journal article supplement (doi:10.1039/c7cp05226j), 2017-01-01
Supplement: c7cp05226j1.pdf [file c7cp05226j1.pdf]

## **Electronic Supplementary Information**

### **Effect of Fluorine Position and Content on Phenylene Spacer in Carbazole Based Organic Sensitizers for Dye Sensitized Solar Cells**

*Mohammad Adil Afroz,<sup>a</sup> Keval K. Sonigara,<sup>b</sup> Telugu Bhim Raju,<sup>a</sup> Saurabh S. Soni<sup>\*b</sup> and Parameswar Krishnan Iyer<sup>\*a,c</sup>*

<sup>a</sup>Department of Chemistry, Indian Institute of Technology Guwahati, Guwahati-781039. India

<sup>b</sup>Department of Chemistry, Sardar Patel University, Vallabh Vidyanagar – 388 120, Gujarat, India.

<sup>c</sup>Center for Nanotechnology, Indian Institute of Technology Guwahati, Guwahati-781039. India

CORRESPONDING AUTHOR: \*Parameswar Krishnan Iyer

AUTHOR EMAIL ADDRESS: pki@iitg.ernet.in

AUTHOR FAX: +91 361 258 2349

| <b>Content</b>                                                                                                    | <b>page</b> |
|-------------------------------------------------------------------------------------------------------------------|-------------|
| 1. Materials and Characterization                                                                                 | S2          |
| 2. Optimized structure of dyes showing dihedral angles and dipole moment calculated using DFT                     | S3          |
| 3. <sup>1</sup> H, <sup>13</sup> C and <sup>19</sup> F NMR spectra and HRMS spectroscopy of synthesized compounds | S3-S15      |
| 4. Cyclic voltammetry curves of the dyes                                                                          | S15         |

## Materials and Characterization:

All the materials used in this work were purchased from different commercial sources and used as received. Precursor 3-bromo-9-hexyl-9H-carbazole was synthesized according to the reported literature.<sup>1</sup> All the reactions were performed under argon atmosphere. Moisture sensitive reactions were carried out with dried and freshly distilled solvents. <sup>1</sup>H, <sup>13</sup>C and <sup>19</sup>F NMR spectra were recorded on a Varian AS400 (400 MHz) or Bruker Ascend 600 (600 MHz) spectrometers, using solvent CDCl<sub>3</sub> or DMSO-d<sub>6</sub>. HRMS spectra were recorded on a Waters (Micro mass MSTechnologies) Q-Tof MS Analyzer spectrometer. The UV-vis absorption spectra for solution were recorded on a Perkin-Elmer Lambda 35 spectrometer and that for film/dye coated TiO<sub>2</sub> films on a Perkin-Elmer Lambda 75 spectrometer. Electrochemical measurements were carried out using a CH Instruments 760D electrochemical workstation at a scan rate of 50 mV/s. A three-electrode cell with platinum wire counter electrode, glassy carbon working electrode and Ag/Ag<sup>+</sup> reference electrode was employed. Tetrabutylammonium hexafluorophosphate (0.1 M) in acetonitrile was used as supporting electrolyte and Fc<sup>+</sup>/Fc couple was used as internal reference. A thin film was casted from 10  $\mu$ L, 1 mM solution of dye in DCM on the working electrode and the measurements were performed at room temperature under inert atmosphere. Time-resolved fluorescence studies were performed using an Edinburgh Life Spec II instrument. Veeco Dektak 150 Surface Profilometer was used for the measurement of the TiO<sub>2</sub> film thickness. Oriel Sol 3A solar simulator from Newport, with a 500 W xenon lamp, connected to AM 1.5 Globe filter and a Keithley-2400 digital source meter were used for IV measurements. A Solartron 1287 gain phase analyser was used for Impedance Spectroscopy (EIS) measurements and analysis was performed by sweeping frequency from 120 KHz to 0.1Hz in dark condition under a bias of -0.65V DC with a small AC perturbation (10 mV). Open-circuit voltage decay (OCVD) and Tafel polarization plot were obtained using a Solartron electrochemical analyser by sweeping potential  $\pm 0.65$  in dark with 25mV/s scan rate. IPCE measurement was carried out on Optosolar SR 300, Germany, where a 250 W xenon lamp was used as the light source. Electronic distribution of frontier molecular orbitals was investigated in Gaussian 09 software package. Calculations were carried out using Density functional theory (DFT) with B3LYP-631G (d,p) basis set.

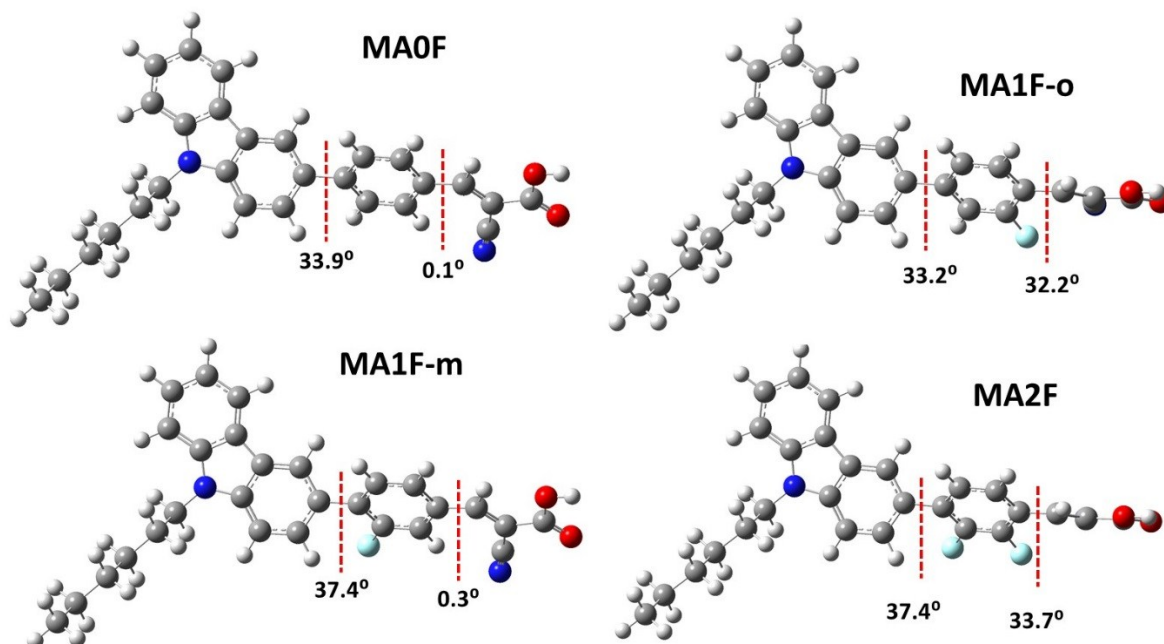

**Fig. S1** Optimized structure of dyes showing dihedral angles

**Table S1:** Dipole moment of the sensitizers calculated using density functional theory

| Dye    | <i>Components of dipole moment<br/>(Debye)</i> |         |         |
|--------|------------------------------------------------|---------|---------|
|        | $\mu_x$                                        | $\mu_y$ | $\mu_z$ |
| MA0F   | -1.5                                           | -6.3    | 6.3     |
| MA1F-o | -0.8                                           | -5.6    | 7.0     |
| MA1F-m | -0.9                                           | -5.3    | 5.5     |
| MA2F   | -0.3                                           | -4.6    | 6.2     |

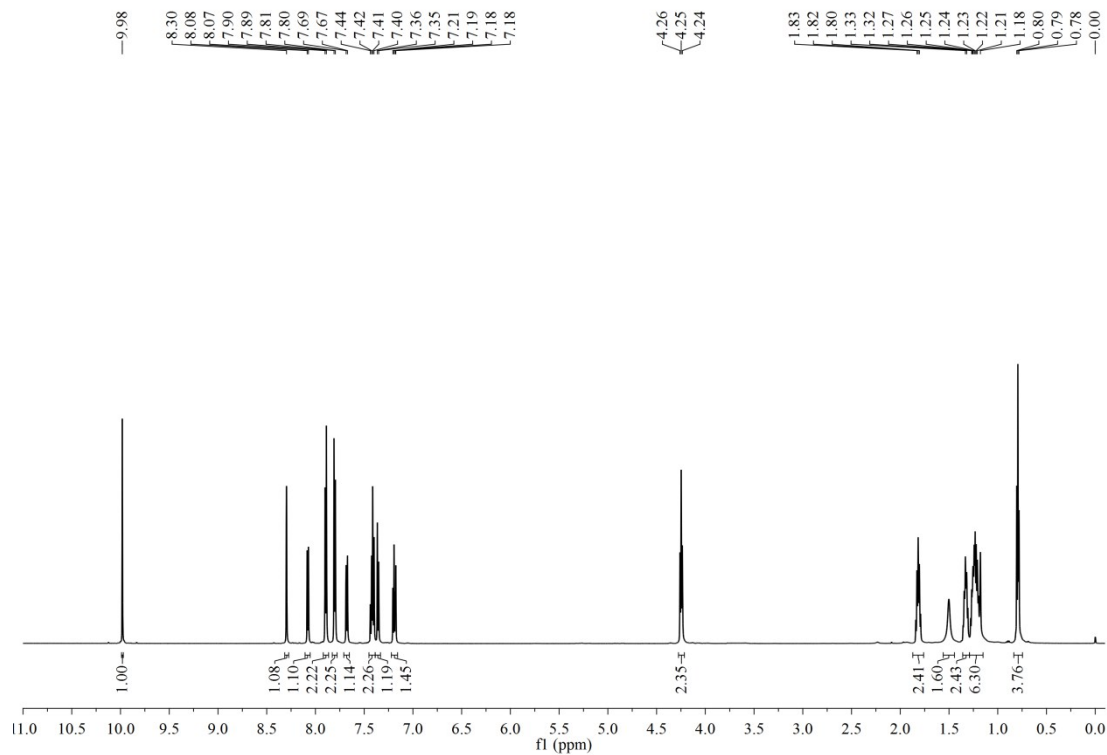

**Fig. S2** <sup>1</sup>H NMR of 4-(9-hexyl-9H-carbazol-3-yl)benzaldehyde (2a)

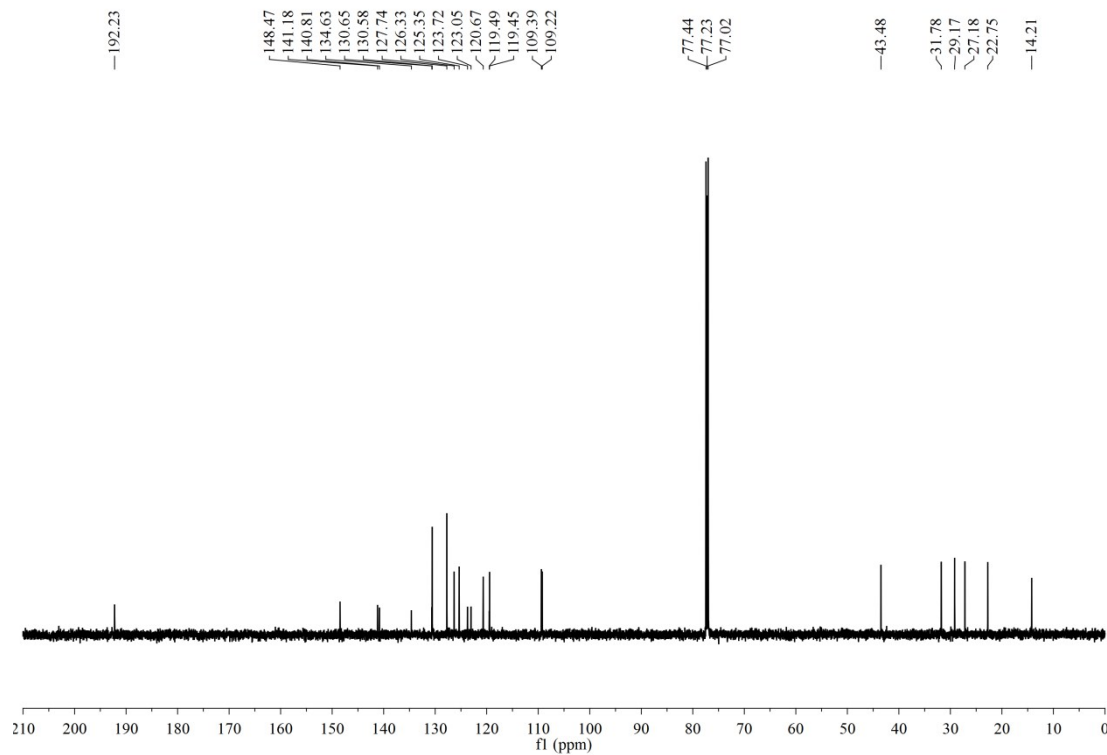

**Fig. S3** <sup>13</sup>C NMR of 4-(9-hexyl-9H-carbazol-3-yl)benzaldehyde (2a)

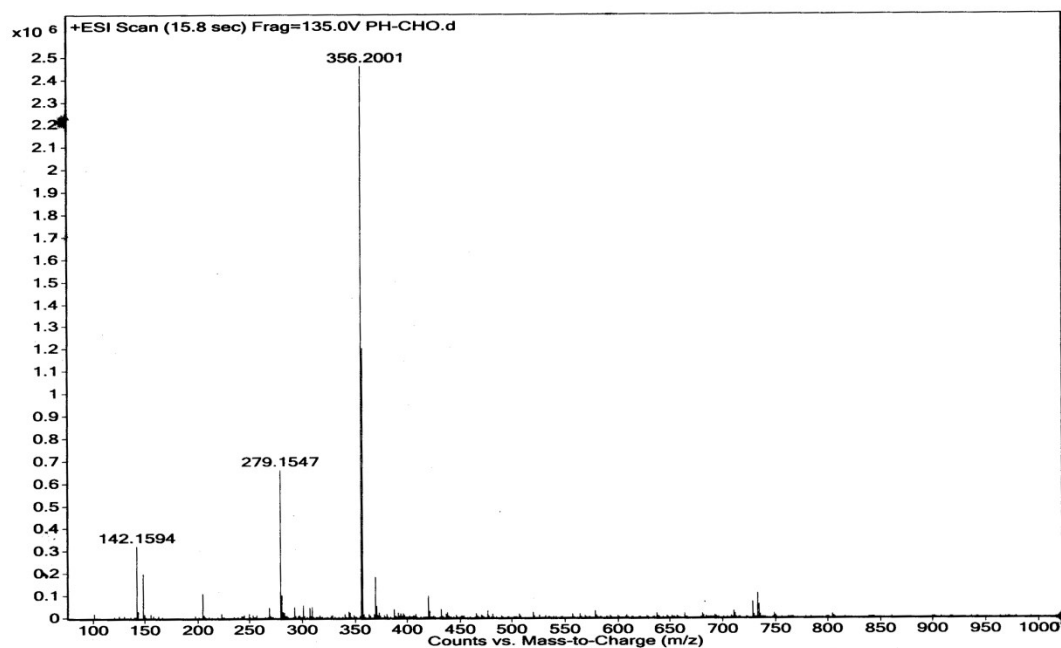

**Fig. S4** HRMS (ESI) of 4-(9-hexyl-9H-carbazol-3-yl)benzaldehyde (2a)

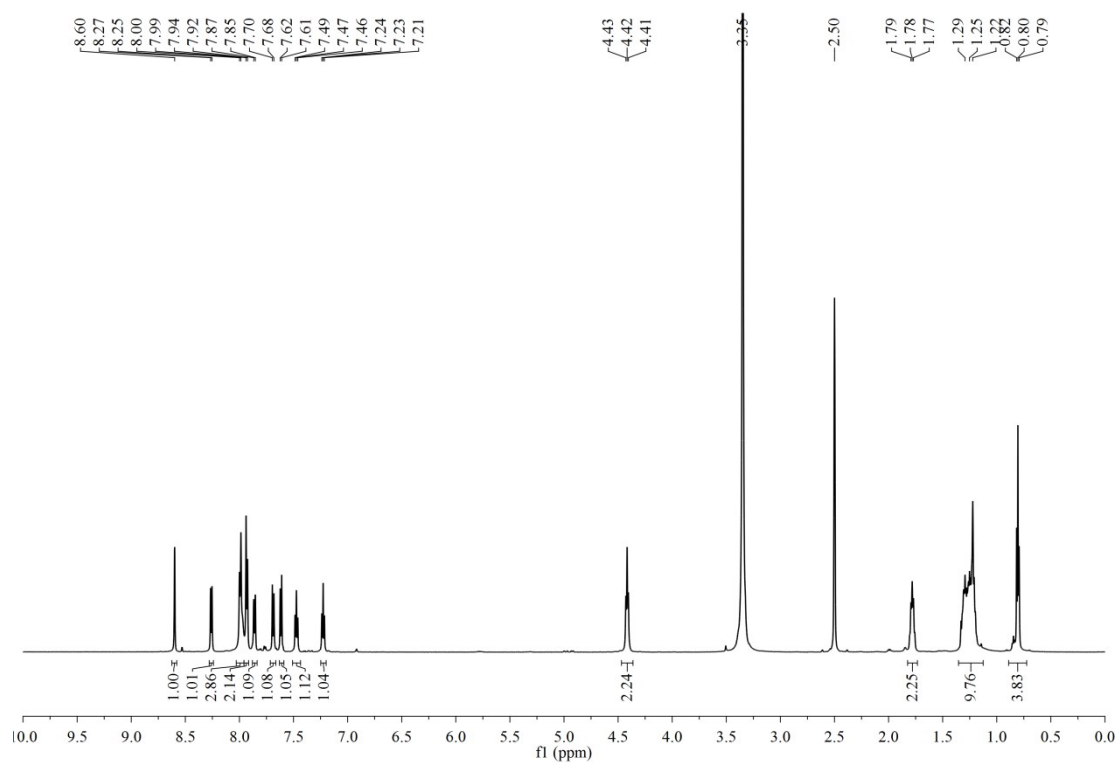

**Fig. S5** <sup>1</sup>H NMR of 2-cyano-3-(4-(9-hexyl-9H-carbazol-3-yl)phenyl)acrylic acid (MA0F)

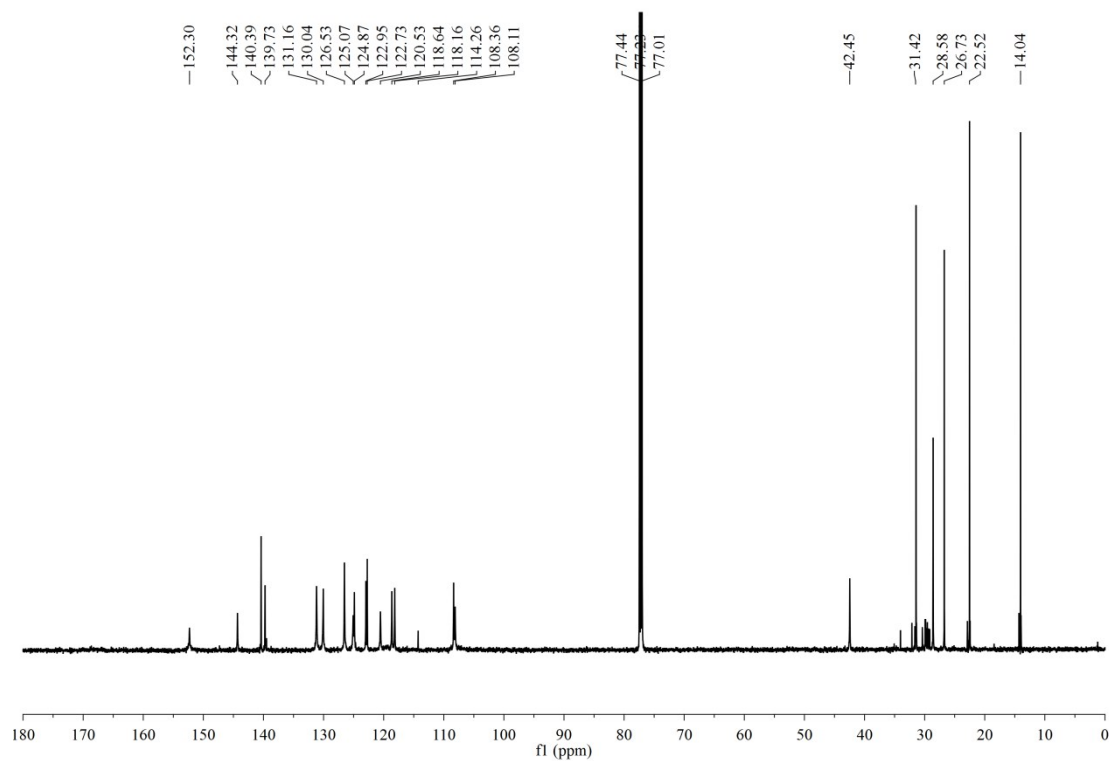

**Fig. S6**  $^{13}\text{C}$  NMR of 2-cyano-3-(4-(9-hexyl-9H-carbazol-3-yl)phenyl)acrylic acid (MA0F)

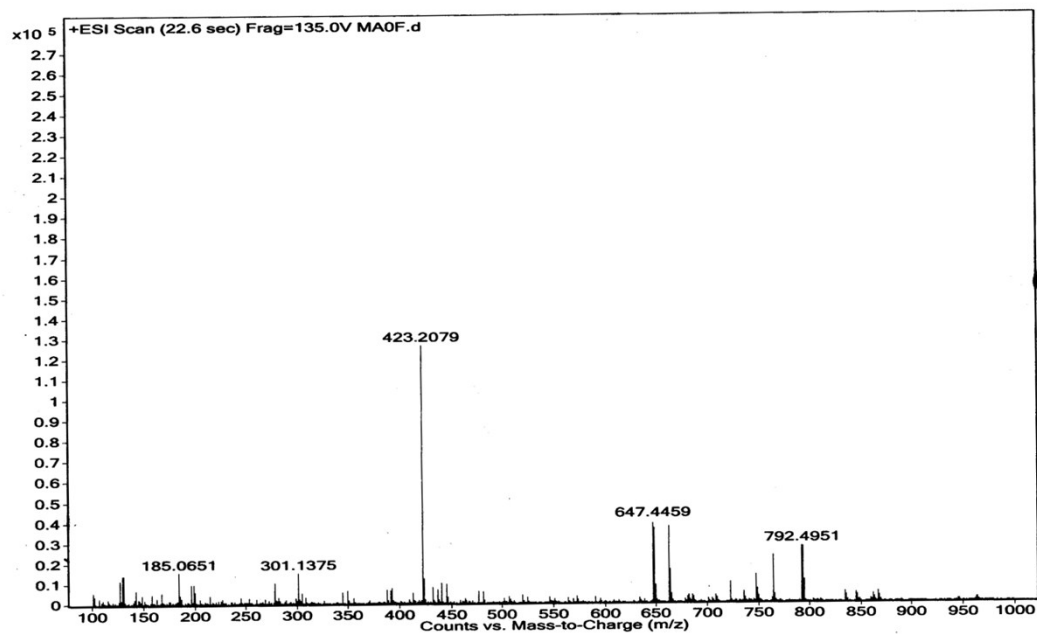

**Fig. S7** HRMS (ESI) of 2-cyano-3-(4-(9-hexyl-9H-carbazol-3-yl)phenyl)acrylic acid (MA0F)

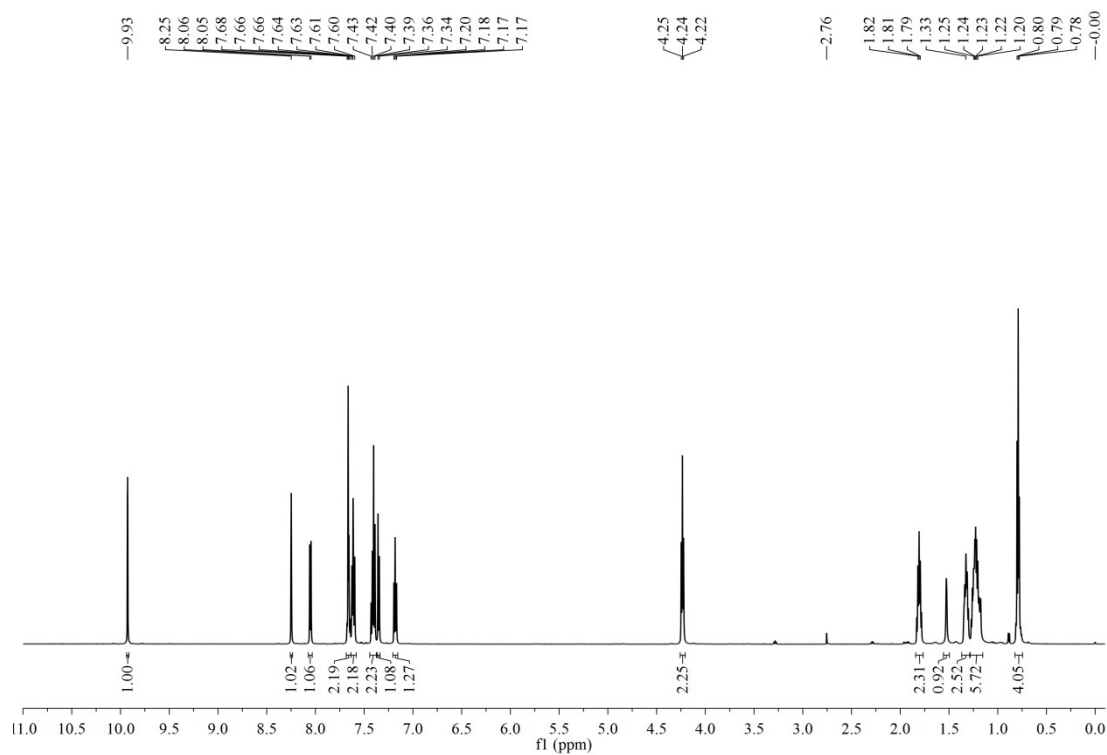

**Fig. S8** <sup>1</sup>H NMR of 3-fluoro-4-(9-hexyl-9H-carbazol-3-yl)benzaldehyde (2c)

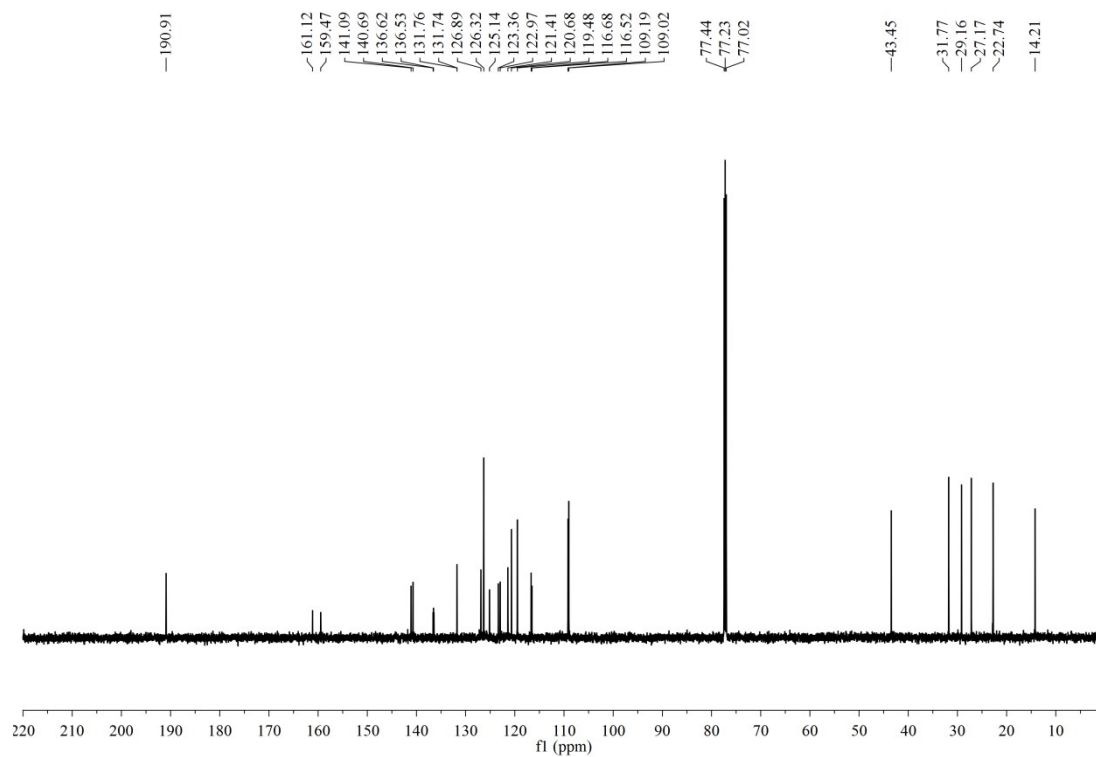

**Fig. S9** <sup>13</sup>C NMR of 3-fluoro-4-(9-hexyl-9H-carbazol-3-yl)benzaldehyde (2c)

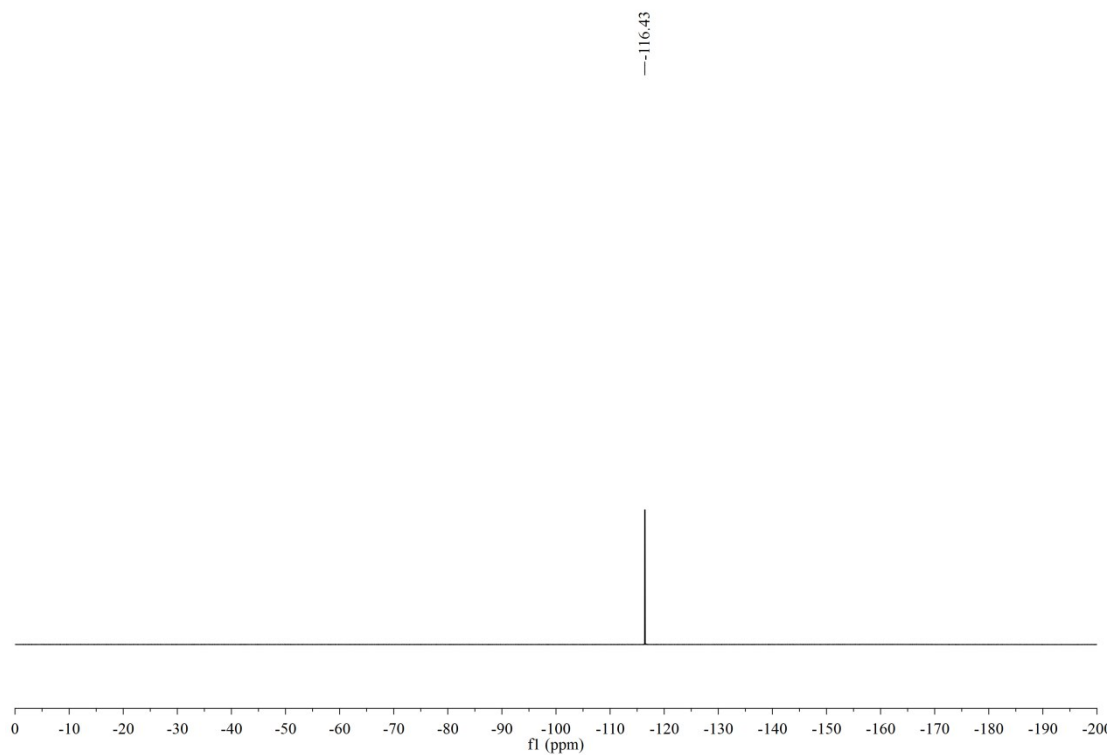

**Fig. S10**  $^{19}\text{F}$  NMR of 3-fluoro-4-(9-hexyl-9H-carbazol-3-yl)benzaldehyde (2c)

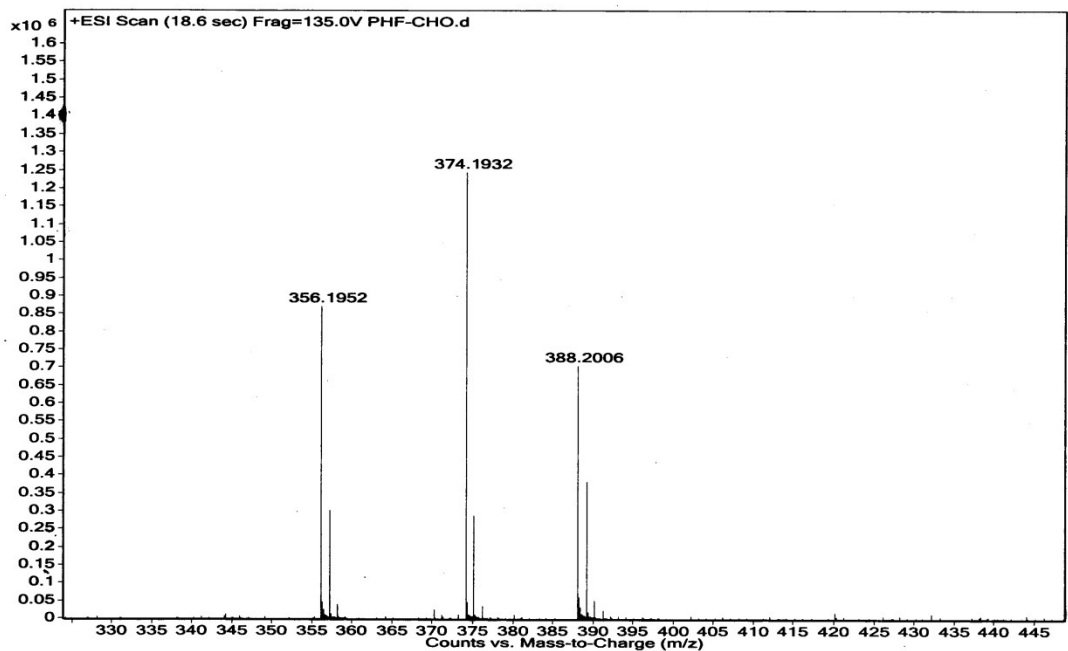

**Fig. S11** HRMS (ESI) of 3-fluoro-4-(9-hexyl-9H-carbazol-3-yl)benzaldehyde (2c)



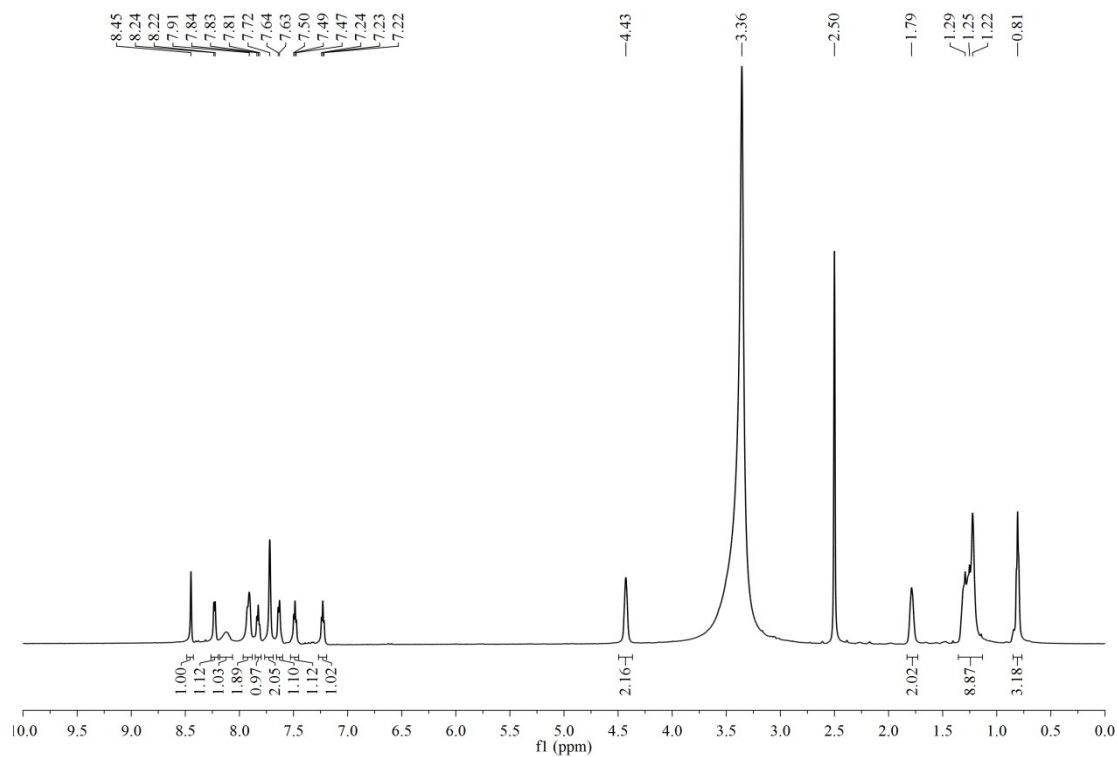

**Fig. S12** <sup>1</sup>H NMR of 2-cyano-3-(3-fluoro-4-(9-hexyl-9H-carbazol-3-yl)phenyl)acrylic acid (MA1F-m)

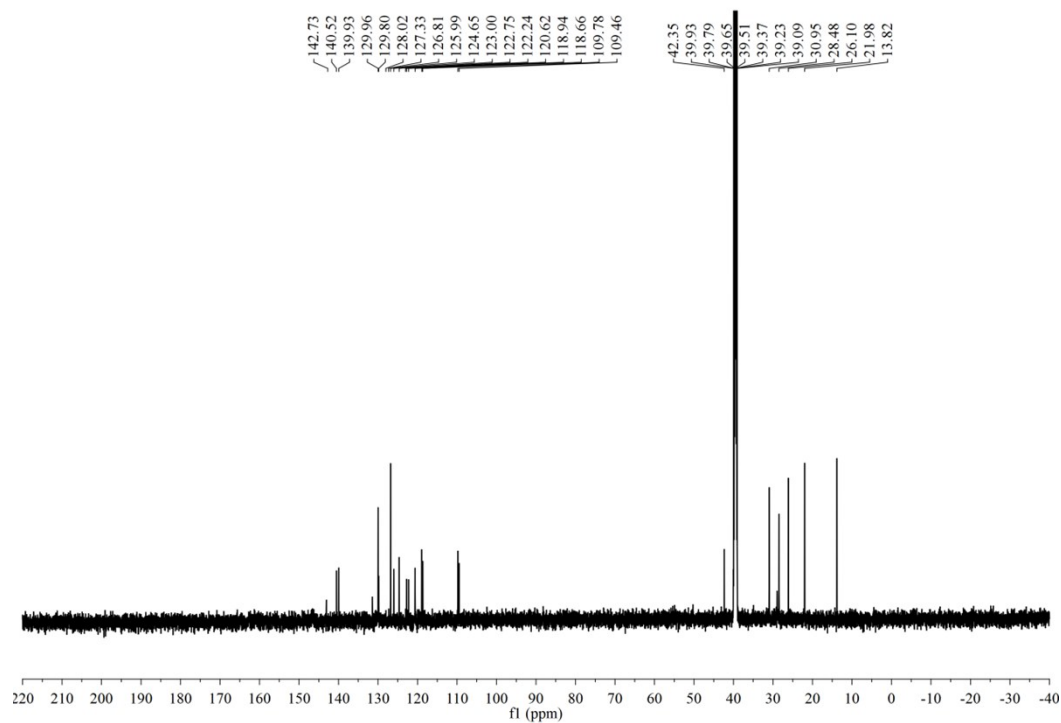

**Fig. S13**  $^{13}\text{C}$  NMR of 2-cyano-3-(3-fluoro-4-(9-hexyl-9H-carbazol-3-yl)phenyl)acrylic acid (MA1F-m)

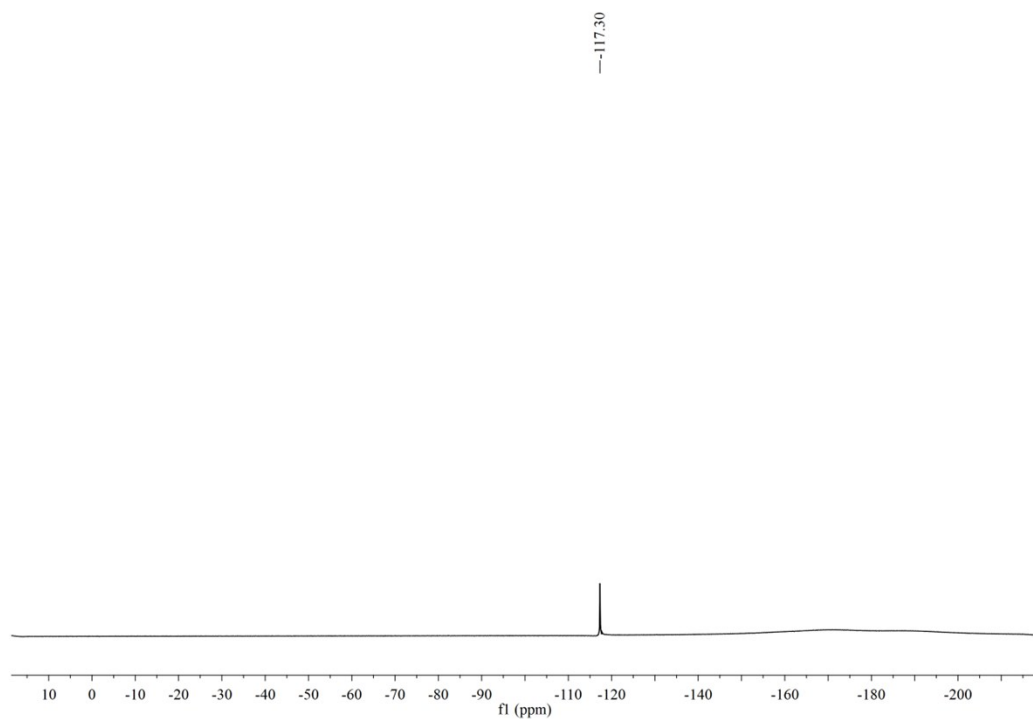

**Fig. S14**  $^{19}\text{F}$  NMR of 2-cyano-3-(3-fluoro-4-(9-hexyl-9H-carbazol-3-yl)phenyl)acrylic acid (MA1F-m)

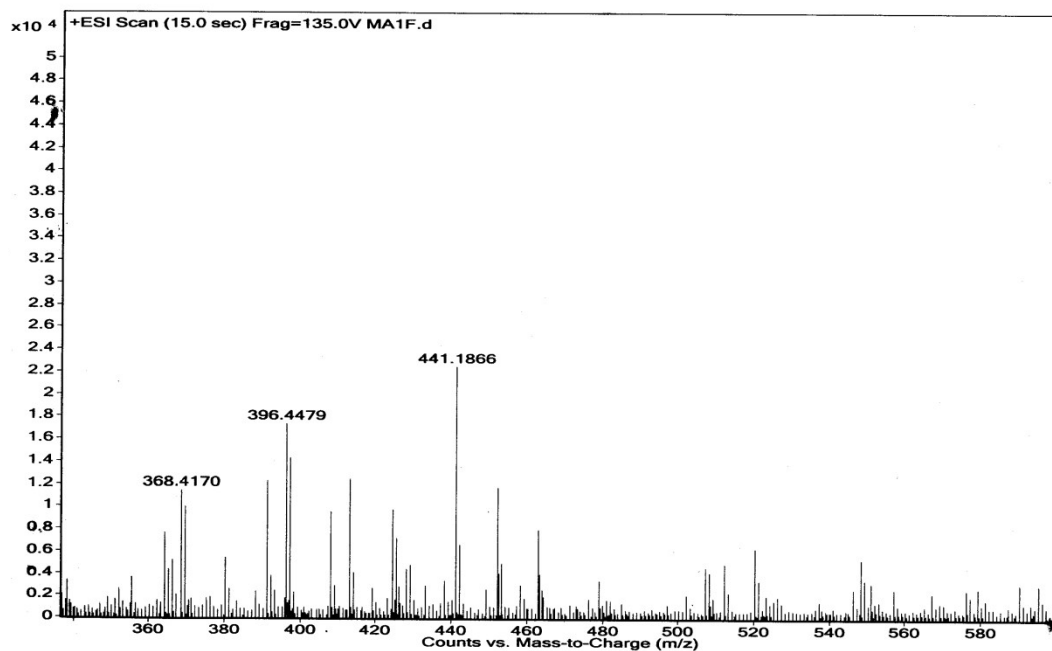

**Fig. S15** HRMS (ESI) of 2-cyano-3-(3-fluoro-4-(9-hexyl-9H-carbazol-3-yl)phenyl)acrylic acid (MA1F-m)

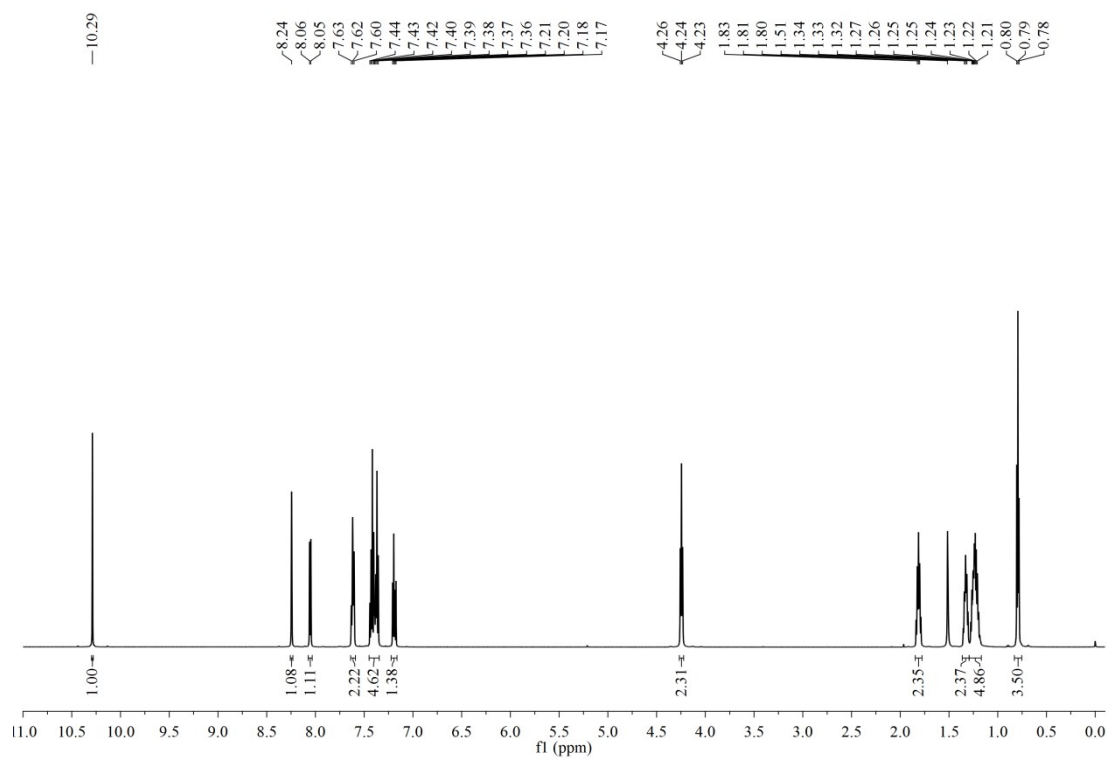

**Fig. S16** <sup>1</sup>H NMR of 2,3-difluoro-4-(9-hexyl-9H-carbazol-3-yl)benzaldehyde (2d)

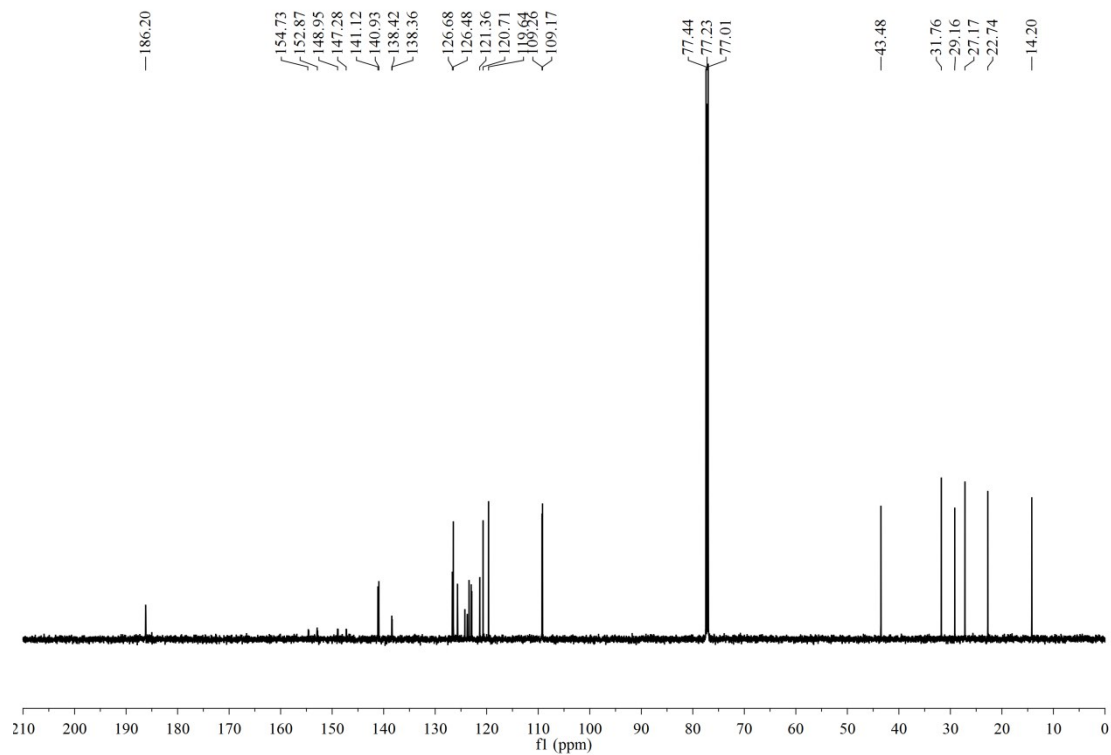

**Fig. S17**  $^{13}\text{C}$  NMR of 2,3-difluoro-4-(9-hexyl-9H-carbazol-3-yl)benzaldehyde (2d)

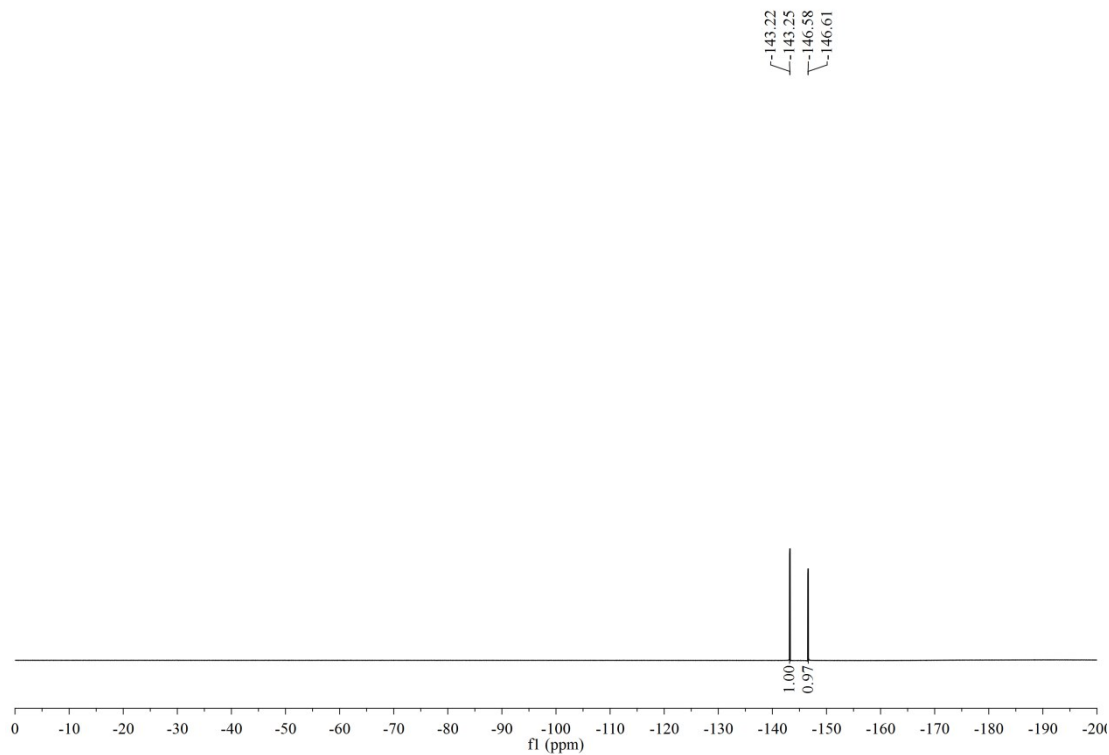

**Fig. S18**  $^{19}\text{F}$  NMR of 2,3-difluoro-4-(9-hexyl-9H-carbazol-3-yl)benzaldehyde (2d)

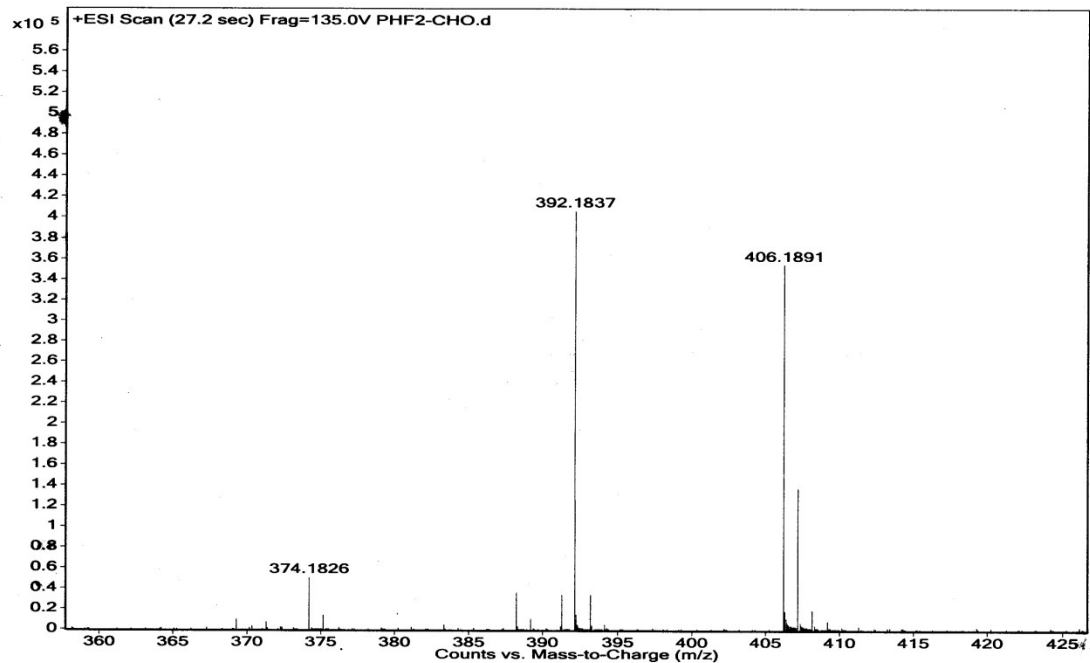

**Fig. S19** HRMS (ESI) of 2,3-difluoro-4-(9-hexyl-9H-carbazol-3-yl)benzaldehyde (2d)

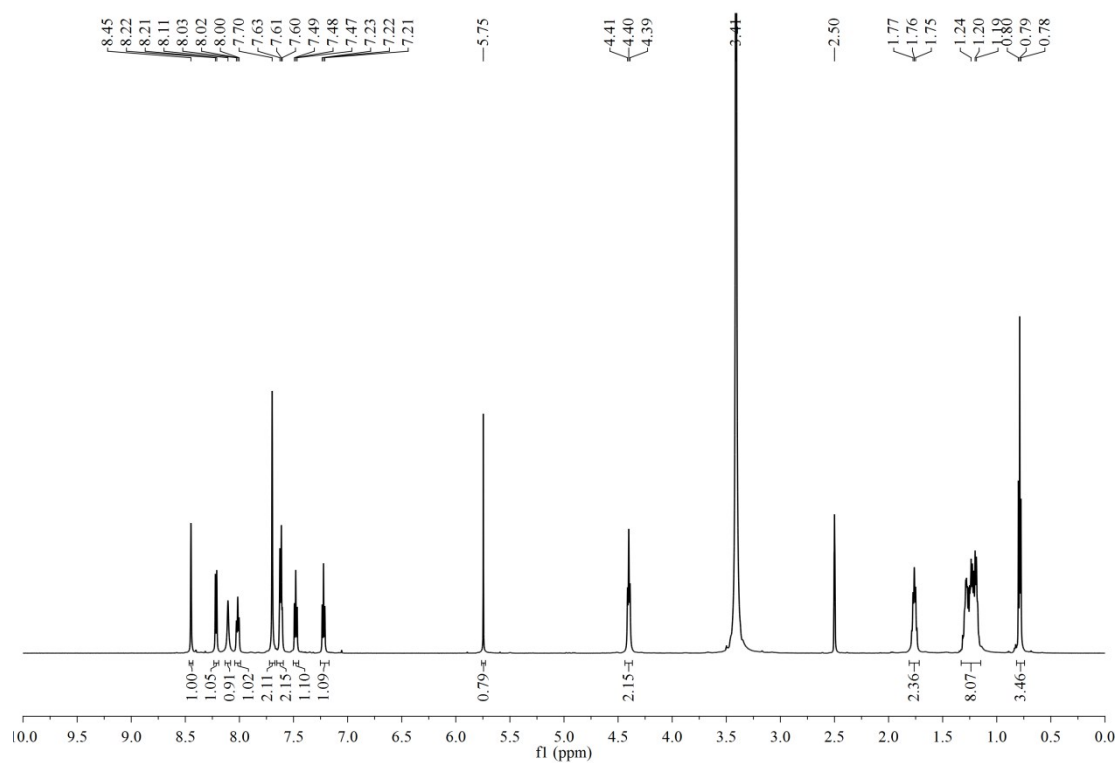

**Fig. S20** <sup>1</sup>H NMR of 2-cyano-3-(2,3-difluoro-4-(9-hexyl-9H-carbazol-3-yl)phenyl)acrylic acid (MA2F)

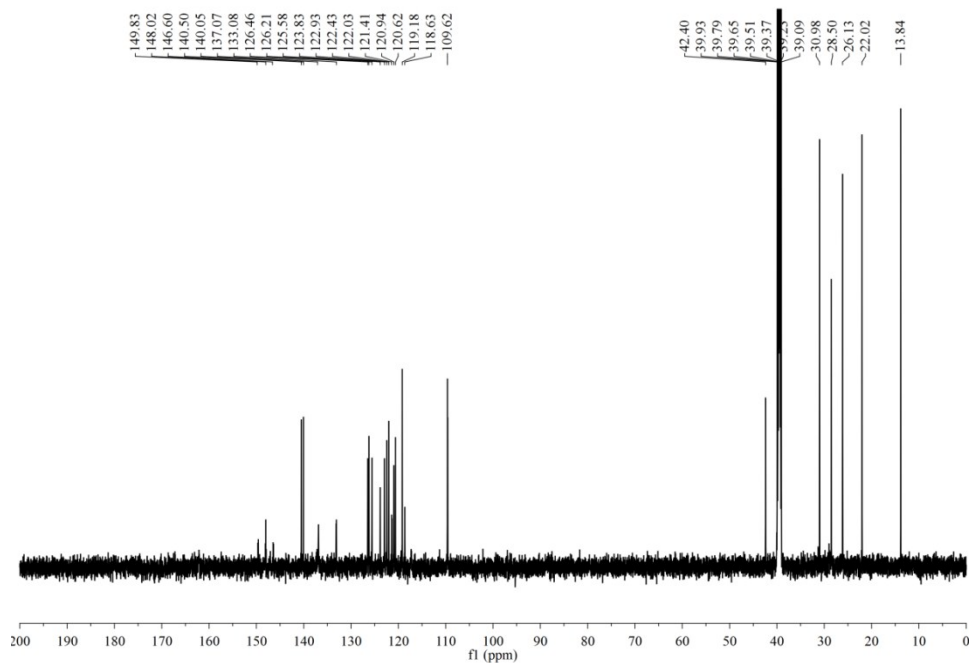

**Fig. S21**  $^{13}\text{C}$  NMR of 2-cyano-3-(2,3-difluoro-4-(9-hexyl-9H-carbazol-3-yl)phenyl)acrylic acid (MA2F)

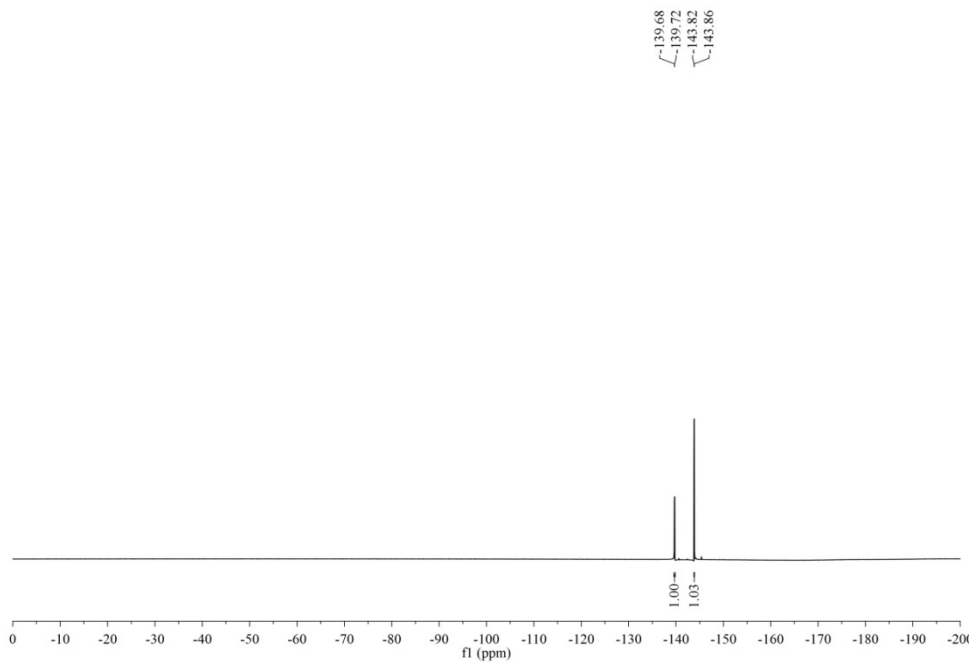

**Fig. S22**  $^{19}\text{F}$  NMR of 2-cyano-3-(2,3-difluoro-4-(9-hexyl-9H-carbazol-3-yl)phenyl)acrylic acid (MA2F)

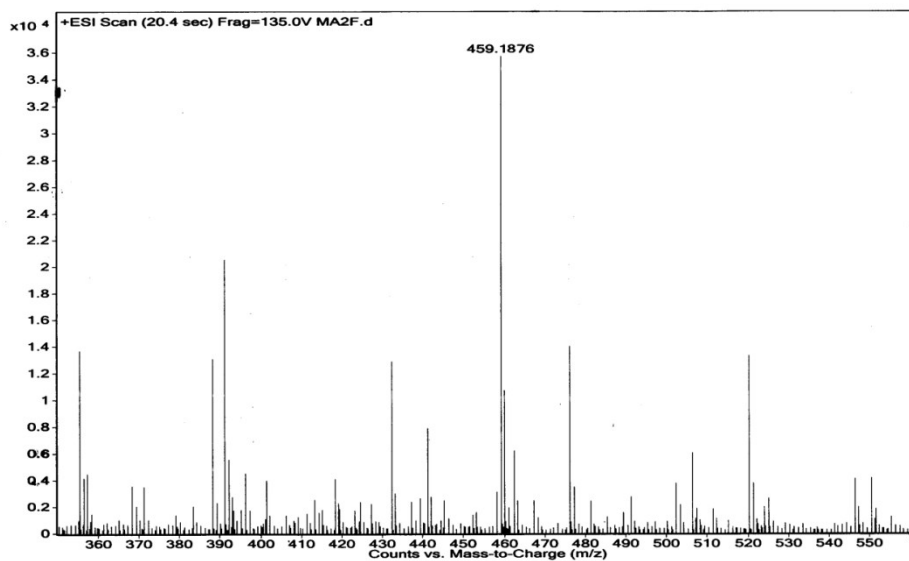

Fig. S23 HRMS (ESI) of 2-cyano-3-(2,3-difluoro-4-(9-hexyl-9H-carbazol-3-yl)phenyl)acrylic acid (MA2F)

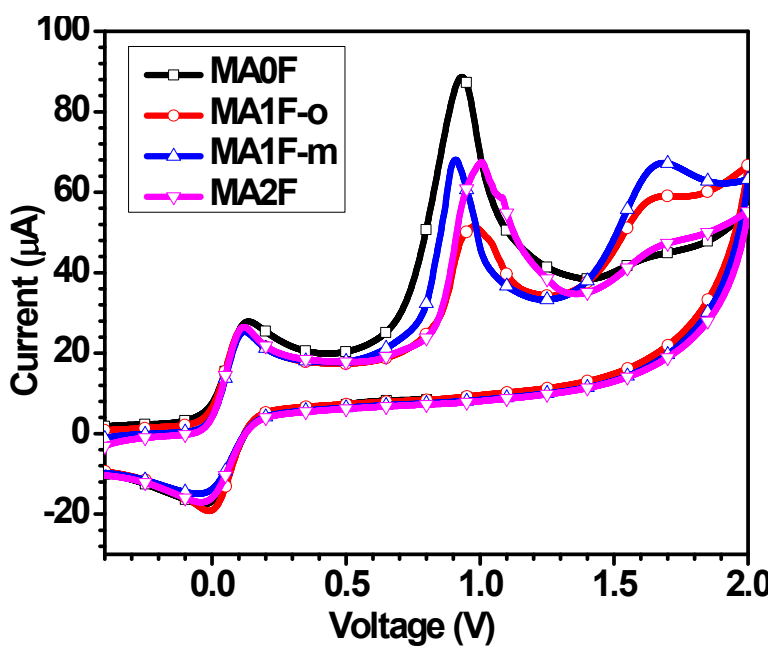

Fig. S24: CV spectra of the dyes

#### Reference:

- (1) Feng, G. L.; Lai, W. Y.; Ji, S. J.; Huang, W. Synthesis of Novel Star-Shaped Carbazole-Functionalized Triazatruxenes. *Tetrahedron Lett.* **2006**, 47 (39), 7089–7092.
